# Supplementary material for: Mucosa-Associated Microbiota in Gastric Cancer Tissues Compared With Non-cancer Tissues
Source: Front Microbiol. 2019 Jun 5;10:1261. doi: 10.3389/fmicb.2019.01261 (PMC6560205; doi:10.3389/fmicb.2019.01261)
Supplement: TABLE S6 — Nearest sequence taxon index (NSTI) scores for all samples. [file Table_6.XLSX]

## Sheet: Sheet1
Table S6. Nearest sequence taxon index (NSTI) scores for all samples.
#Sample ID	group	Metric	NSTI scores
YS56	no-cancer	Weighted NSTI	0.0493802
YS22	no-cancer	Weighted NSTI	0.0446322
YS11	no-cancer	Weighted NSTI	0.0441084
YS89	no-cancer	Weighted NSTI	0.0395011
YS96	no-cancer	Weighted NSTI	0.038752
YS30	no-cancer	Weighted NSTI	0.0369263
YS48	no-cancer	Weighted NSTI	0.0368935
YS99	no-cancer	Weighted NSTI	0.0339981
YS71	no-cancer	Weighted NSTI	0.0336614
YS27	no-cancer	Weighted NSTI	0.0331611
YS41	no-cancer	Weighted NSTI	0.0326371
YS63	no-cancer	Weighted NSTI	0.0322155
YS13	no-cancer	Weighted NSTI	0.0317102
YS84	no-cancer	Weighted NSTI	0.031655
YS65	no-cancer	Weighted NSTI	0.0313779
YS6	no-cancer	Weighted NSTI	0.030803
YS25	no-cancer	Weighted NSTI	0.0300783
YS36	no-cancer	Weighted NSTI	0.0300252
YS79	no-cancer	Weighted NSTI	0.0299741
YS57	no-cancer	Weighted NSTI	0.0298727
YS103	no-cancer	Weighted NSTI	0.0296544
YS32	no-cancer	Weighted NSTI	0.0292884
YS47	no-cancer	Weighted NSTI	0.0287788
YS46	no-cancer	Weighted NSTI	0.0283036
YS21	no-cancer	Weighted NSTI	0.0282665
YS74	no-cancer	Weighted NSTI	0.0281006
YS16	no-cancer	Weighted NSTI	0.0277555
YS7	no-cancer	Weighted NSTI	0.0276157
YS53	no-cancer	Weighted NSTI	0.0274023
YS59	no-cancer	Weighted NSTI	0.0266794
YS50	no-cancer	Weighted NSTI	0.0266532
YS60	no-cancer	Weighted NSTI	0.0266047
YS37	no-cancer	Weighted NSTI	0.0263204
YS9	no-cancer	Weighted NSTI	0.0263163
YS24	no-cancer	Weighted NSTI	0.0262099
YS33	no-cancer	Weighted NSTI	0.0258371
YS109	no-cancer	Weighted NSTI	0.0257417
YS17	no-cancer	Weighted NSTI	0.0256055
YS101	no-cancer	Weighted NSTI	0.0254867
YS87	no-cancer	Weighted NSTI	0.025484
YS18	no-cancer	Weighted NSTI	0.0254464
YS62	no-cancer	Weighted NSTI	0.0254423
YS88	no-cancer	Weighted NSTI	0.0253294
YS15	no-cancer	Weighted NSTI	0.0252125
YS19	no-cancer	Weighted NSTI	0.0251775
YS54	no-cancer	Weighted NSTI	0.025171
YS108	no-cancer	Weighted NSTI	0.0251043
YS90	no-cancer	Weighted NSTI	0.0251028
YS64	no-cancer	Weighted NSTI	0.0249947
YS67	no-cancer	Weighted NSTI	0.0249712
YS72	no-cancer	Weighted NSTI	0.0249474
YS28	no-cancer	Weighted NSTI	0.0249277
YS77	no-cancer	Weighted NSTI	0.0249198
YS78	no-cancer	Weighted NSTI	0.0248943
YS12	no-cancer	Weighted NSTI	0.0248145
YS100	no-cancer	Weighted NSTI	0.0247627
YS23	no-cancer	Weighted NSTI	0.0247416
YS35	no-cancer	Weighted NSTI	0.0246624
YS85	no-cancer	Weighted NSTI	0.0246498
YS68	no-cancer	Weighted NSTI	0.0246322
YS55	no-cancer	Weighted NSTI	0.024015
YS51	no-cancer	Weighted NSTI	0.0177758
C59	cancer	Weighted NSTI	0.144135
C63	cancer	Weighted NSTI	0.107094
C47	cancer	Weighted NSTI	0.102252
C33	cancer	Weighted NSTI	0.0953752
C28	cancer	Weighted NSTI	0.0706626
C62	cancer	Weighted NSTI	0.0569317
C36	cancer	Weighted NSTI	0.0542184
C96	cancer	Weighted NSTI	0.0517205
C108	cancer	Weighted NSTI	0.0513251
C46	cancer	Weighted NSTI	0.0513119
C99	cancer	Weighted NSTI	0.0504094
C37	cancer	Weighted NSTI	0.0471646
C78	cancer	Weighted NSTI	0.0449275
C32	cancer	Weighted NSTI	0.0442637
C25	cancer	Weighted NSTI	0.0386236
C60	cancer	Weighted NSTI	0.0385918
C89	cancer	Weighted NSTI	0.0380895
C56	cancer	Weighted NSTI	0.0379167
C74	cancer	Weighted NSTI	0.0375842
C57	cancer	Weighted NSTI	0.0374995
C9	cancer	Weighted NSTI	0.0367664
C64	cancer	Weighted NSTI	0.0362938
C79	cancer	Weighted NSTI	0.0356858
C103	cancer	Weighted NSTI	0.0352931
C22	cancer	Weighted NSTI	0.0335174
C24	cancer	Weighted NSTI	0.033405
C48	cancer	Weighted NSTI	0.0321672
C30	cancer	Weighted NSTI	0.0320057
C100	cancer	Weighted NSTI	0.0315283
C41	cancer	Weighted NSTI	0.0312697
C51	cancer	Weighted NSTI	0.030996
C27	cancer	Weighted NSTI	0.0297656
C87	cancer	Weighted NSTI	0.0294389
C21	cancer	Weighted NSTI	0.0292407
C35	cancer	Weighted NSTI	0.0288618
C17	cancer	Weighted NSTI	0.0283737
C23	cancer	Weighted NSTI	0.0283507
C77	cancer	Weighted NSTI	0.0282317
C101	cancer	Weighted NSTI	0.028067
C68	cancer	Weighted NSTI	0.0278069
C84	cancer	Weighted NSTI	0.0277458
C12	cancer	Weighted NSTI	0.0276274
C72	cancer	Weighted NSTI	0.0274626
C54	cancer	Weighted NSTI	0.0271037
C90	cancer	Weighted NSTI	0.027079
C85	cancer	Weighted NSTI	0.027059
C88	cancer	Weighted NSTI	0.0270421
C55	cancer	Weighted NSTI	0.0267285
C19	cancer	Weighted NSTI	0.0265687
C67	cancer	Weighted NSTI	0.0265245
C11	cancer	Weighted NSTI	0.0264595
C53	cancer	Weighted NSTI	0.0261821
C6	cancer	Weighted NSTI	0.0261286
C109	cancer	Weighted NSTI	0.0260225
C16	cancer	Weighted NSTI	0.0257972
C13	cancer	Weighted NSTI	0.02575
C50	cancer	Weighted NSTI	0.0255824
C18	cancer	Weighted NSTI	0.0255747
C71	cancer	Weighted NSTI	0.0254975
C15	cancer	Weighted NSTI	0.0253695
C65	cancer	Weighted NSTI	0.0220135
